# Supplementary material
Source: publisher site journal article supplement (https://www.spandidos-publications.com/8592/downloadSupplementary)

Figure S1. Results of high-performance liquid chromatography showing the detection of Aln. (A) Blank control. (B) Aln. (C) Strontium-based metal organic frameworks loaded with Aln. The blue box indicates the characteristic absorption peaks of Aln. Aln, alendronate sodium.

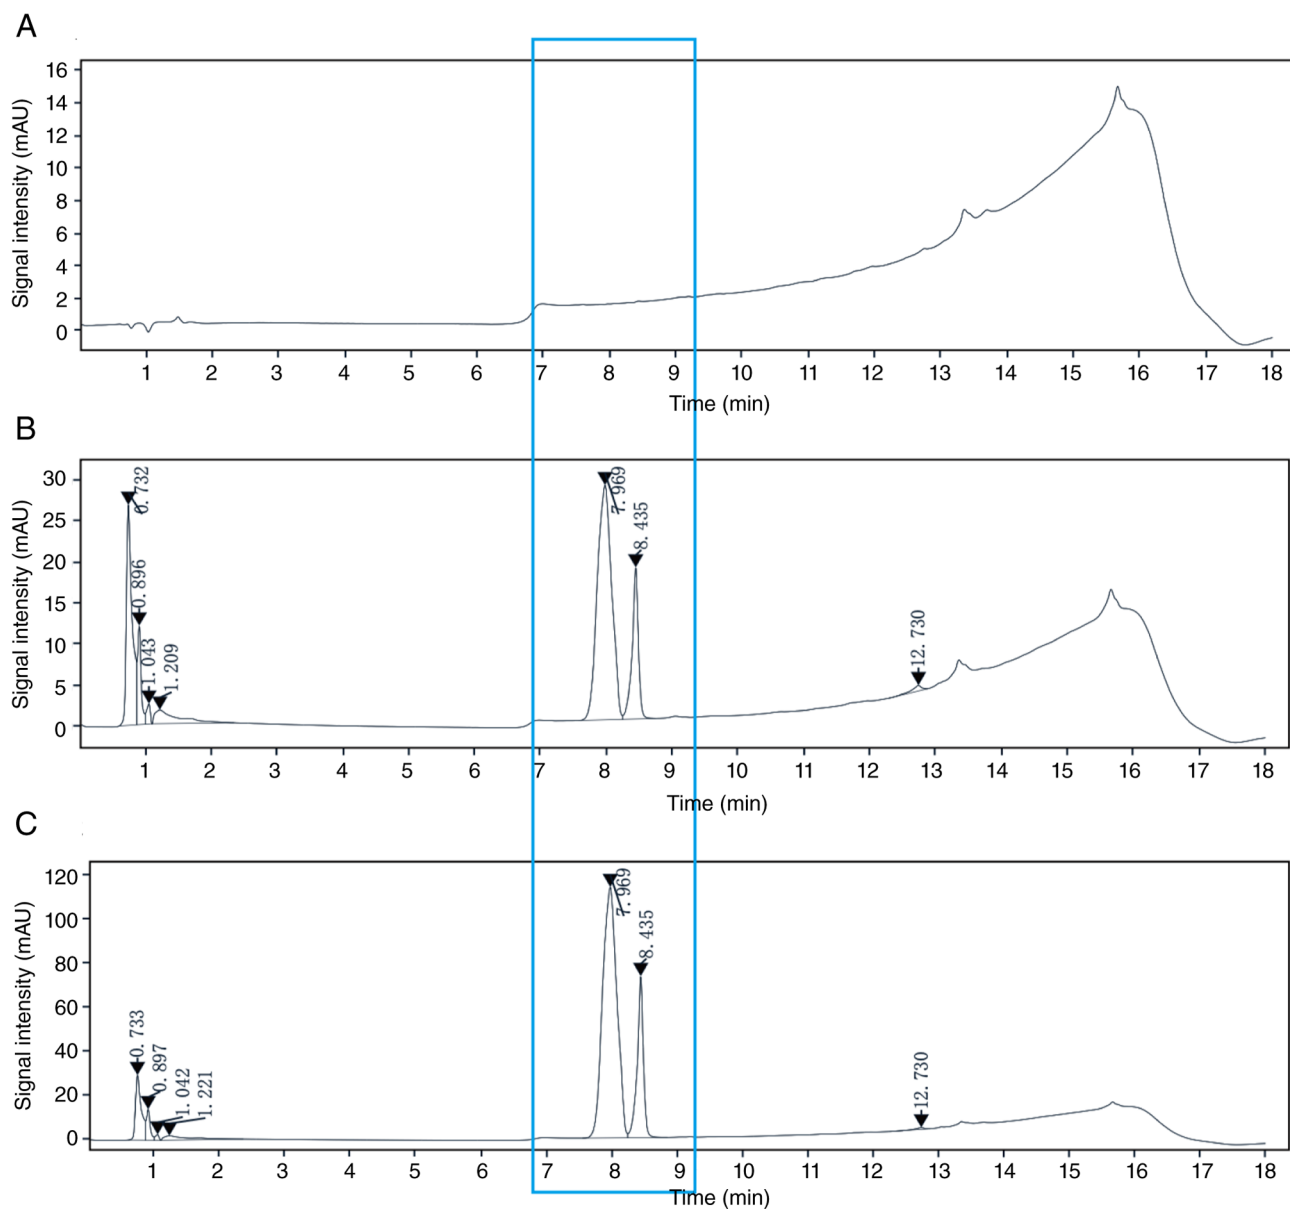

Supplement: Supplementary file 1 [file downloadSupplementary]
